# Supplementary material for: Facile fabrication of reduced graphene oxide covered ZnCo2O4 porous nanowire array hierarchical structure on Ni-foam as a high performance anode for a lithium-ion battery
Source: Royal Society of Chemistry journal article supplement (doi:10.1039/c5ra21916g), 2015-12-08
Supplement: c5ra21916g1.pdf [file c5ra21916g1.pdf]

## Supporting Information

### **Facile fabrication of reduced graphene oxide covered ZnCo<sub>2</sub>O<sub>4</sub> porous nanowire arrays hierarchical structure on Ni-foam as a high performance anode for lithium-ion battery**

Yujue Wang,<sup>a</sup> Yongzhi Zhang,<sup>b</sup> Junke Ou,<sup>c</sup> Qian Zhao,<sup>d</sup> Mei Liao,<sup>a</sup> and Dan Xiao<sup>\*ad</sup>

<sup>a</sup>College of Chemistry, Sichuan University, 29 Wangjiang Road, Chengdu 610064, China. E-mail: xiaodan@scu.edu.cn; Fax: +86-28-85412907; Tel: +86-28-85416218

<sup>b</sup>Institute of New Energy and Low-Carbon Technology, Sichuan University, No.24 South Section 1, Yihuan Road, Chengdu 610065, China. Fax: +86-28-6213-8325; Tel: +86-28-6213-8375

<sup>c</sup>School of Basic Medical Sciences & Nursing, Chengdu University, Shiling Town, Chengdu 610106, China. E-mail: ojk0001@163.com

<sup>d</sup>College of Chemical Engineering, Sichuan University, 29 Wangjiang Road, Chengdu 610064, China. E-mail: xiaodan@scu.edu.cn; Fax: +86-28-85415029; Tel: +86-28-85416029

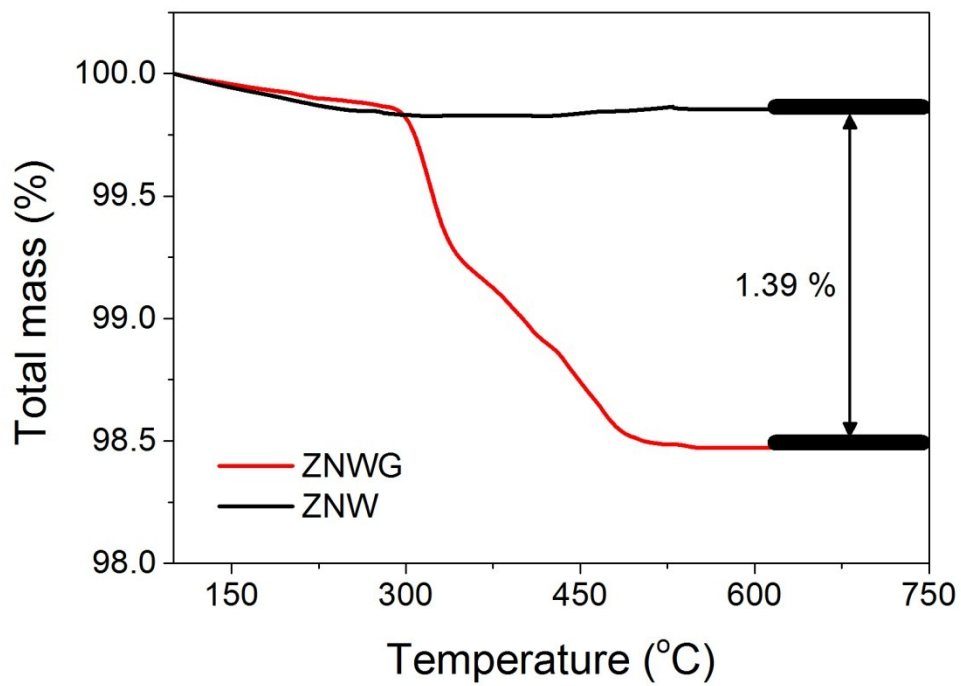

**Fig. S1** TGA curves of ZNWG and ZNW.

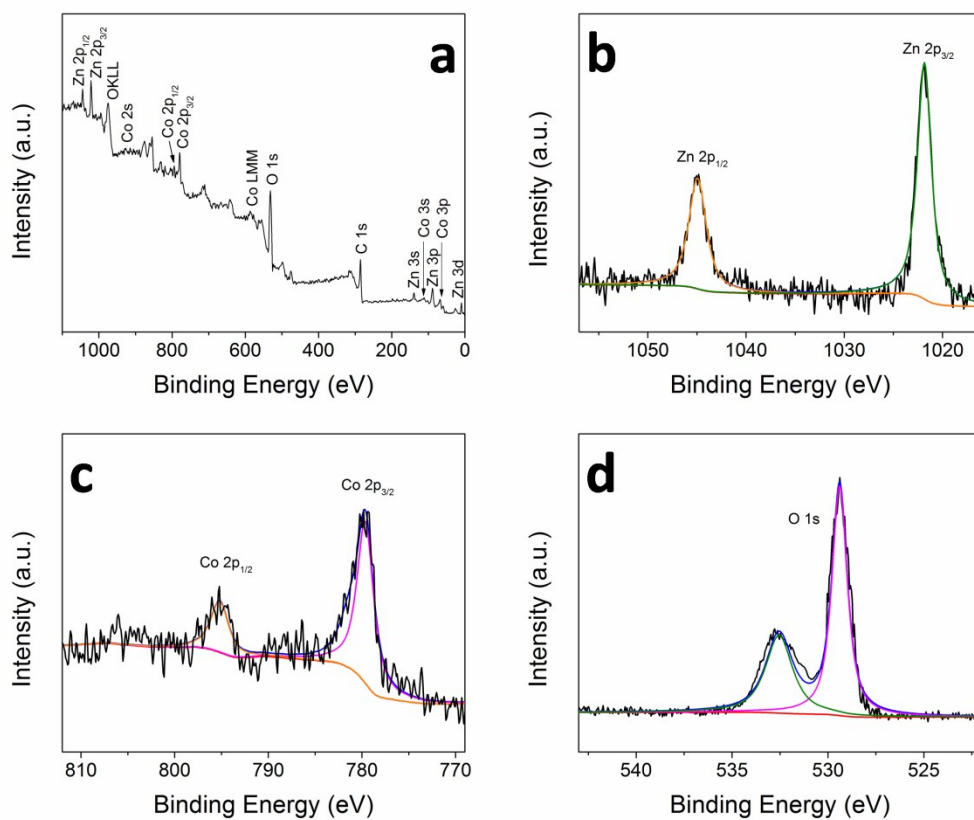

**Fig. S2** XPS spectra of ZNW: (a) survey spectrum and high resolution (b) Zn 2p, (c) Co 2p, (d) O 1s spectra.

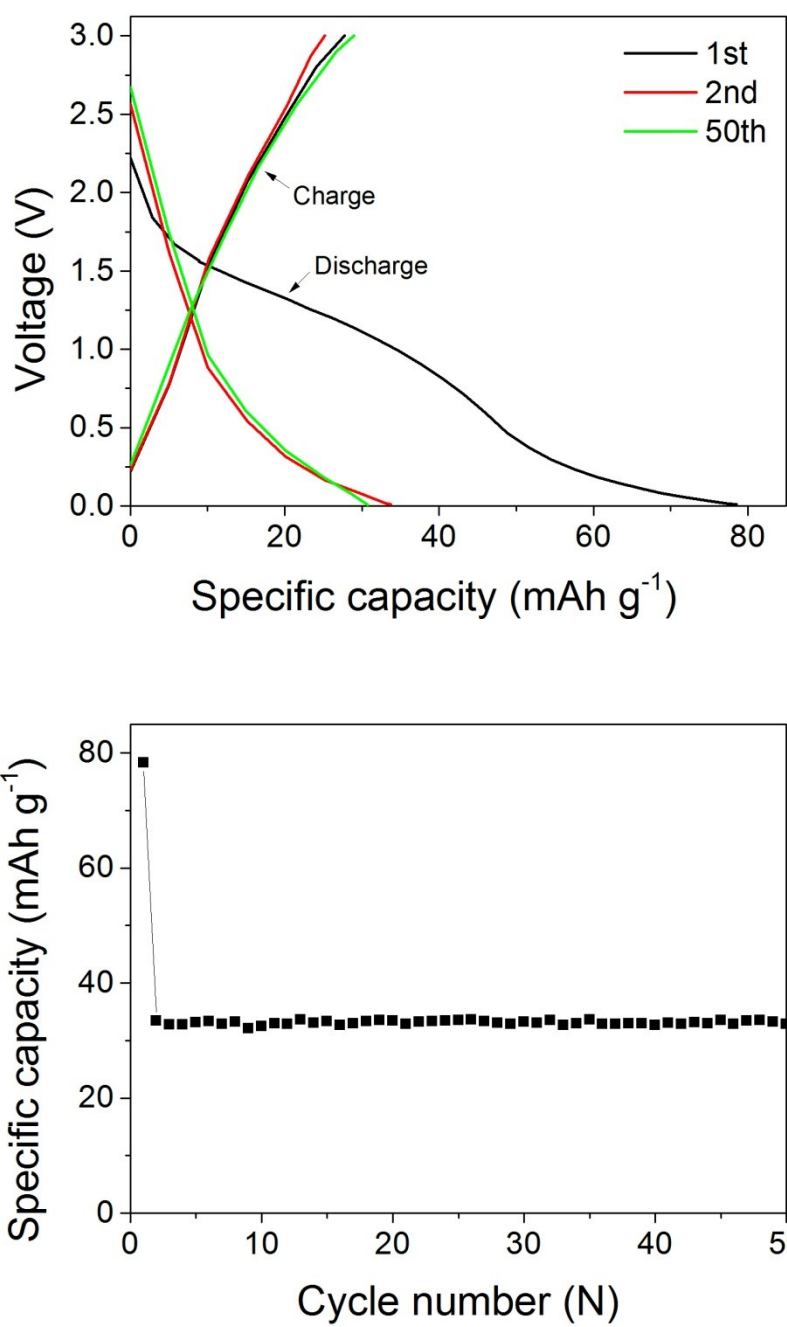

**Fig. S3** Discharge-charge profile and cycling performance of pure GO acting as anode for LIB at a current density of 0.2 A g<sup>-1</sup>.

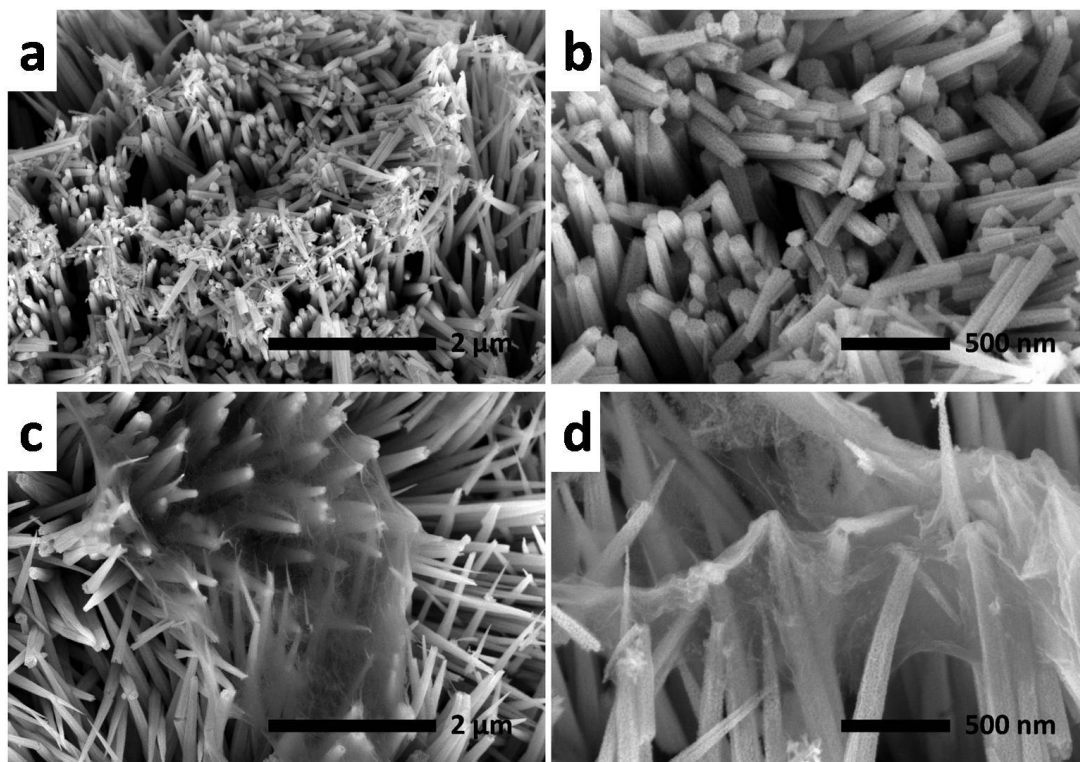

**Fig. S4** SEM images of ZNW (a, b) and ZNWG (c, d) on Ni-foam after 50 cycles at a current density of  $0.5 \text{ A g}^{-1}$ .

**Table. S1** Corresponding active material loadings for each electrode in

Fig. 6.

|                                         |          |          |               |              |             |
|-----------------------------------------|----------|----------|---------------|--------------|-------------|
| <b>Electrode</b>                        | <b>a</b> | <b>b</b> | <b>c</b>      | <b>d</b>     | <b>e</b>    |
| <b>Loading<br/>(mg cm<sup>-2</sup>)</b> | 1.32     | 1.13     | 1.26          | 1.05         | 1.76        |
| <b>Electrode</b>                        | <b>f</b> | <b>g</b> | <b>h-ZNWG</b> | <b>h-ZNW</b> | <b>h-ZP</b> |
| <b>Loading<br/>(mg cm<sup>-2</sup>)</b> | 1.52     | 1.39     | 1.25          | 1.20         | 1.44        |

**Table. S2** Electrochemical performances of the ZNWG electrode in this work compared with other works reported previously.

| Electrode material                                                            | Initial reversible capacity (mA h g <sup>-1</sup> ) | Current density (A g <sup>-1</sup> ) | Cycling performance                              |
|-------------------------------------------------------------------------------|-----------------------------------------------------|--------------------------------------|--------------------------------------------------|
| <b>ZNWG (this work)</b>                                                       | <b>1371</b>                                         | <b>0.1</b>                           | <b>1208 mA h g<sup>-1</sup> after 100 cycles</b> |
|                                                                               | <b>1170</b>                                         | <b>0.5</b>                           | <b>1032 mA h g<sup>-1</sup> after 100 cycles</b> |
| Porous ZnCo <sub>2</sub> O <sub>4</sub> Nanowires <sup>1</sup>                | 1092.9                                              | 0.1                                  | 1197.9 mA h g <sup>-1</sup> after 20 cycles      |
| ZnO/ZnCo <sub>2</sub> O <sub>4</sub> submicron rod arrays <sup>2</sup>        | 1071                                                | 0.045                                | ~900 mA h g <sup>-1</sup> after 30 cycles        |
| Electrospun porous ZnCo <sub>2</sub> O <sub>4</sub> nanotubes <sup>3</sup>    | ~1100                                               | 0.5                                  | 1011 mA h g <sup>-1</sup> after 30 cycles        |
| rGO/ZnCo <sub>2</sub> O <sub>4</sub> nanocomposite <sup>4</sup>               | 1071.1                                              | 0.09                                 | 960.8 mA h g <sup>-1</sup> after 100 cycles      |
| ZnCo <sub>2</sub> O <sub>4</sub> /NiO core/shell nanowire arrays <sup>5</sup> | 776                                                 | 0.1                                  | 357 mA h g <sup>-1</sup> after 50 cycles         |
| Wrinkled-Paper-like Co-ZnO@C <sup>6</sup>                                     | 862                                                 | 0.1                                  | 538 mA h g <sup>-1</sup> after 50 cycles         |

**Table. S3** Relevant solution resistance ( $R_s$ ), charge transfer resistance ( $R_{ct}$ ) for 1<sup>st</sup> and 100<sup>th</sup> cycles,  $R_{ct}$  increase of ZNWG, ZNW and ZP electrode, respectively.

| <b>Electrode</b>                                                            | <b>ZNWG</b> | <b>ZNW</b> | <b>ZP</b> |
|-----------------------------------------------------------------------------|-------------|------------|-----------|
| <b><math>R_s</math> (<math>\Omega</math>)</b>                               | 2.36        | 4.47       | 12.7      |
| <b><math>R_{ct}</math> for 1<sup>st</sup> cycle (<math>\Omega</math>)</b>   | 80.2        | 90.0       | 315       |
| <b><math>R_{ct}</math> for 100<sup>th</sup> cycle (<math>\Omega</math>)</b> | 232         | 337        | 1472      |
| <b><math>R_{ct}</math> increase (%)</b>                                     | 289         | 374        | 467       |



## References

1. N. Du, Y. Xu, H. Zhang, J. Yu, C. Zhai and D. Yang, *Inorg. Chem.*, 2011, 50, 3320-3324.
2. C. W. Lee, S. D. Seo, D. W. Kim, S. Park, K. Jin, D. W. Kim and K. S. Hong, *Nano Res.*, 2013, 6, 348-355.
3. W. Luo, X. Hu, Y. Sun and Y. Huang, *J. Mater. Chem.*, 2012, 22, 8916-8921.
4. G. Gao, H. B. Wu, B. Dong, S. Ding and X. W. D. Lou, *Adv. Sci.*, 2015, 2.
5. Z. Sun, W. Ai, J. Liu, X. Qi, Y. Wang, J. Zhu, H. Zhang and T. Yu, *Nanoscale*, 2014, 6, 6563-6568.
6. A. K. Giri, P. Pal, R. Ananthakumar, M. Jayachandran, S. Mahanty and A. B. Panda, *Cryst. Growth Des.*, 2014, 14, 3352-3359.
